# Supplementary material for: Nanocharacterization of liposomes for the encapsulation of water soluble compounds from Cordyceps sinensis CS1197 by a supercritical gas anti-solvent technique
Source: PubMed Central journal article supplement — RSC Adv. 2018 Oct 9;8(60):34634–49. doi: 10.1039/c8ra07601d (PMC9086942; doi:10.1039/c8ra07601d), 2018-10-09
Supplement: RA-008-C8RA07601D-s001.pdf [file RA-008-C8RA07601D-s001.pdf]

### Supplementary Figures caption

- 1) S. Fig.1 Liposome stability index, a) Effect of pressure; b) Effect of surfactant (Tween 80) concentration; c) Effect of temperature.
- 2) S.Fig. 2 Flow behavior of Liposome prepared at 180 bar, 50 °C and 0.75% Tween 80.
- 3) S. Fig. 3 Regression of first order and Higuchi model to *in vitro* kinetic release data for CS nano-liposomes formulation.

### Supplementary Table

- 1) S.Table 1.

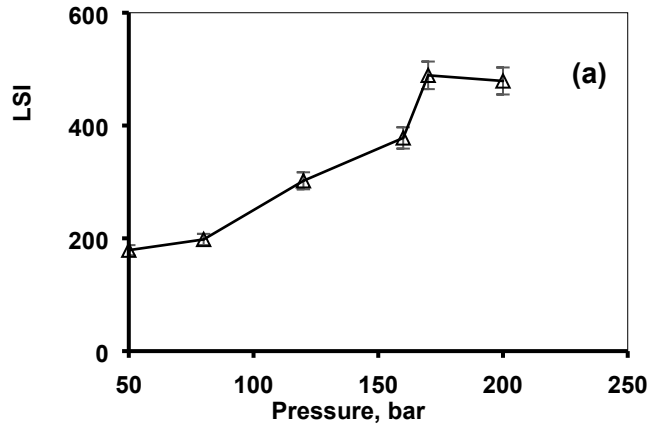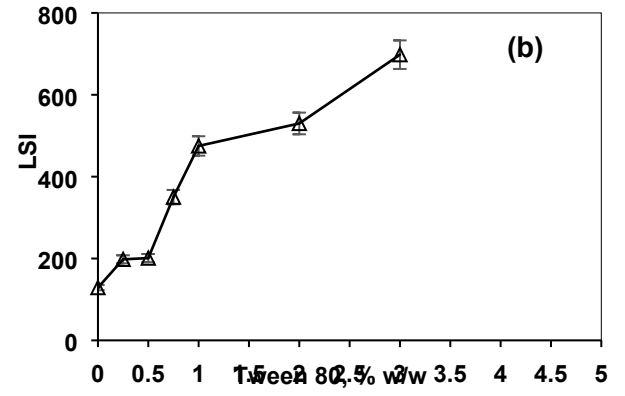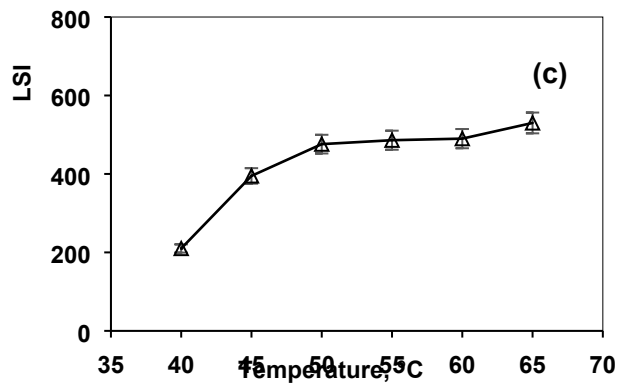

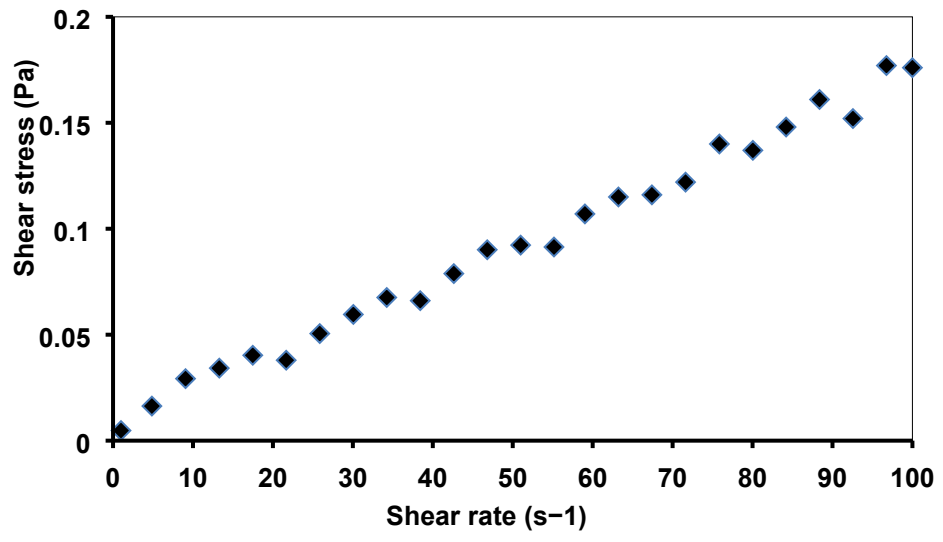

S.Fig.2

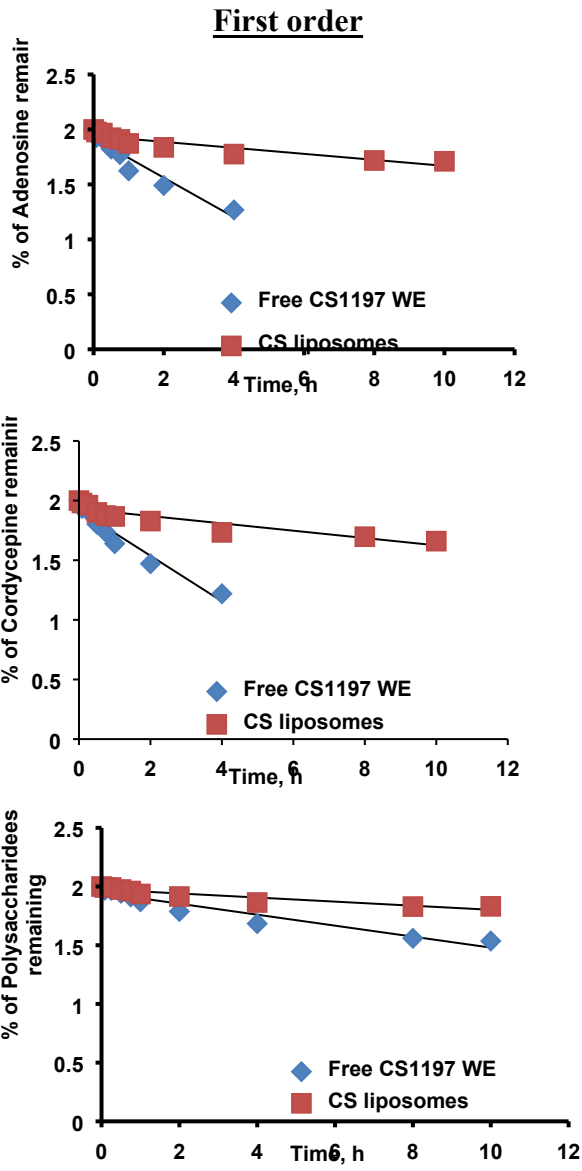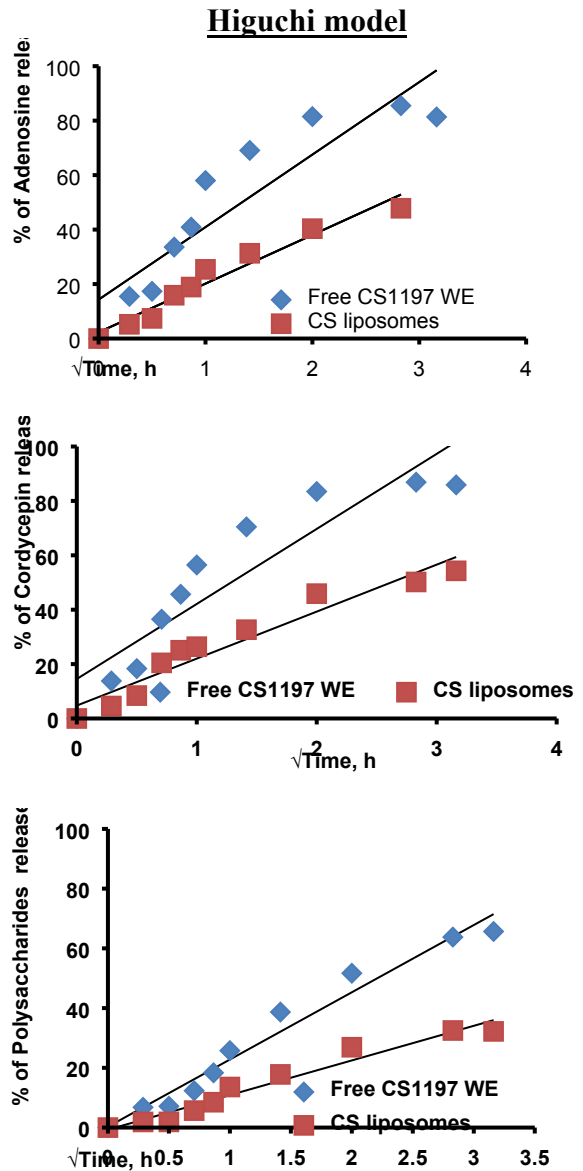

S. Fig. 3

**S.Table 1.** Effect of formulation conditions on viscosity of liposomes prepared by SC-GAS method.

| <b>P<br/>(bar)</b> | <b>C<sub>u</sub></b> | <b>Viscosity<br/>(mPa.s)</b> | <b>T<br/>(°C)</b> | <b>C<sub>u</sub></b> | <b>Viscosity<br/>(mPa.s)</b> | <b>T-80<br/>%</b> | <b>C<sub>u</sub></b> | <b>Viscosity<br/>(mPa.s)</b> |
|--------------------|----------------------|------------------------------|-------------------|----------------------|------------------------------|-------------------|----------------------|------------------------------|
| 50                 | 8.32 ± 0.013         | 1.32 ± 0.02                  | 40                | 3.18 ± 0.012         | 1.39 ± 0.03                  | 0                 | 9.68 ± 0.014         | 1.16 ± 0.01                  |
| 80                 | 4.49 ± 0.011         | 1.39 ± 0.01                  | 45                | 3.02 ± 0.010         | 1.36 ± 0.01                  | 0.25              | 4.65 ± 0.012         | 1.23 ± 0.01                  |
| 120                | 3.14 ± 0.013         | 1.49 ± 0.05                  | 50                | 2.80 ± 0.015         | 1.58 ± 0.01                  | 0.5               | 3.98 ± 0.014         | 1.56 ± 0.03                  |
| 160                | 1.12 ± 0.012         | 1.68 ± 0.02                  | 55                | 2.79 ± 0.012         | 1.59 ± 0.01                  | 0.75              | 3.14 ± 0.011         | 1.54 ± 0.01                  |
| 180                | 1.10 ± 0.011         | 1.79 ± 0.02                  | 60                | 2.88 ± 0.010         | 1.53 ± 0.04                  | 1                 | 2.78 ± 0.013         | 1.59 ± 0.01                  |
| 200                | 1.19 ± 0.012         | 1.78 ± 0.01                  | 65                | 2.98 ± 0.018         | 1.55 ± 0.05                  | 2                 | 2.70 ± 0.012         | 1.60 ± 0.02                  |
|                    |                      |                              |                   |                      |                              | 3                 | 2.85 ± 0.009         | 1.92 ± 0.01                  |

T – Temperature; P – Pressure; T-80 – Tween 80.
